# Supplementary material for: Revealing the characteristics of a novel bioflocculant and its flocculation performance in Microcystis aeruginosa removal
Source: Springer Nature journal article supplement (doi:10.1038/srep17465), 2015-12-02
Supplement: 41598_2015_BFsrep17465_MOESM1_ESM.pdf [file 41598_2015_BFsrep17465_MOESM1_ESM.pdf]

# **Revealing the characteristics of a novel bioflocculant and its flocculation performance in *Microcystis aeruginosa* removal**

Pengfei Sun<sup>a</sup>, Cai Hui<sup>a</sup>, Naling Bai<sup>a</sup>, Shengmao Yang<sup>b</sup>, Li Wan<sup>c</sup>, Qichun Zhang<sup>d\*</sup>,  
YuHua Zhao<sup>a\*</sup>

<sup>a</sup> *College of Life Sciences, Zhejiang University, 310058 Hangzhou, Zhejiang, PR China*

<sup>b</sup> *Institute of Environment Resource and Soil Fertilizer, Zhejiang Academy of Agriculture Science, 310021 Hangzhou, Zhejiang, China.*

<sup>c</sup> *Department of Chemical and Biomolecular Engineering, Vanderbilt University, 37235-1604, Nashville, Tennessee, USA*

<sup>d</sup> *College of Environmental and Resource Sciences, Zhejiang University, 310058 Hangzhou, Zhejiang, PR China*

---

\* Corresponding authors.

Tel.: +86-571-88982413; E-mail address: qc Zhang@zju.edu.cn (Q.C. Zhang)

Tel. +86-571-88208557; E-mail address: microbeapply@zju.edu.cn (Y.H. Zhao)

1 AAGTATCCGGCGGTCTTCACGGTGTAGGGGCATCCGTCGTAACGCCTTGTGACCACTC  
61 TTGACGTTACGGTTCATCGTAAGTATCCGGCGGTCTTCACGGTGTAGGGGCATCCGTCGT  
121 AAACGCCTTGTGACCACTCTTGACGTTACGGTTCATCGTGACGGAAAAATCCATTATCA  
181 GCGGTACGAGCGCGGTGTACCTGTGGCCGATCTTGAAGTGATCGGCGAAACTGATAAGAC  
241 CGGAACGATTACGCACTTCGTTCCGGACCCGGAAATTTTCAAAGAAACAACGTGATATGA  
301 CTATGATCTGCTTTCAAACCGTGTCCGGGAATTGGCCTTCCTGACAAAAGGCGTAAACAT  
361 CACGATTGAAGACAAACGTGAAGGACAAGAACGGAAAAACGAGTACCACTACGAAGGCGG  
421 AATCAAAGCTATGTTGAGTACTTAAACCGTTCCAAAGAAGTCGTTTCATGAAGAGCCGAT  
481 TTATATTGAAGGCGAGAAAGACGGCATAACGGTTGAAGTTGCATTGCAATACAACGACAG  
541 CTATACAAGCAATATTTATTCTTTCACAAATAATATCAACACATACGAAGGCGGCACGCA  
601 CGAGGCCGGATTTAAACCGGTCTGACCCGTGCATAAACGACTATGCAAGAAGAAAAGG  
661 GATTTTCAAAGAAAATGATCCGAATTTAAGCGGGGATGATGTGAGAGAAGGGCTGACTGC  
721 CATTATTTCAATTAAGCACCCCTGATCCGCAATTCGAAGGGCAGACGAAAACCAAGCTCGG  
781 CAACTCCGAAGCGAGAACGATCACTGATACGCTGTTTTCTTCTGCGCTGGAAACATTCTT  
841 TCTTGAAAATCCGGACTCAGCCCGCAAATCGTTGAAAAAGGTTAATGGCCGCAAGAGC  
901 GCGGATGGCGGCGAAAAAAGCCCGGAATTGACCCGGCGCAAAGTGCGCTTGAGATTTT  
961 CAATCTGCCGGGCAAACGTGGCGGACTGTTCTTCTAAAGATCCGAGCATTTCGAGCTGTA  
1021 TATCGTAGAGGGTACTCTGCGGGCGGATCAGCGAAACAGGGACGGGACCGTCATTTCCA  
1081 AGCCATTCTGCCGCTGCGCGGTAAGATTCTGAACGTTGAGAAAGCCAGACTTGATAAGAT  
1141 TCTCTCAAACAATGAGGTCAGATCAATGATCACGGCCCTCGGAACAGGAATCGGAGAAGA  
1201 TTTAATCTTGAAAACGCGCGTTATCATAAAGTGGTC

Figure S1 Sequence of the *gyrB* gene of *Bacillus amyloliquefaciens* DT.

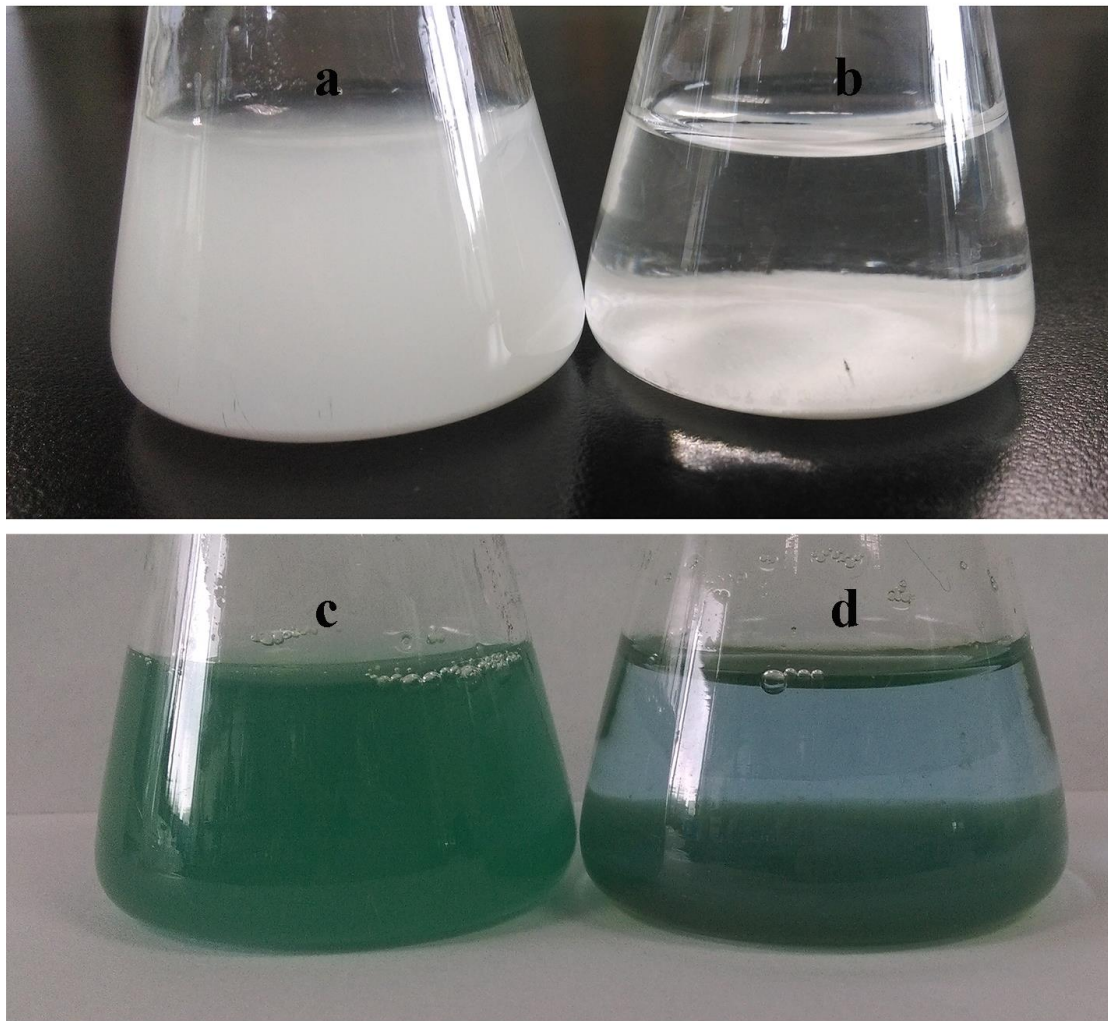

Figure S2 The actual effects of EPS-1 against kaolin suspensions and *Microcystis aeruginosa* cultures. (a) Untreated kaolin suspension; (b) EPS-1 treated kaolin suspension; (c) Untreated *Microcystis aeruginosa* culture; (d) EPS-1 treated *Microcystis aeruginosa* culture.
